# Supplementary material for: Comparative Immunogenicity of COVID-19 Vaccines in a Population-Based Cohort Study with SARS-CoV-2-Infected and Uninfected Participants
Source: MDPI journal article supplement (doi:10.3390/vaccines10020324), 2022-02-18
Supplement: s1 [file s1]

## Supplemental Figures

### Supplemental Figure S1

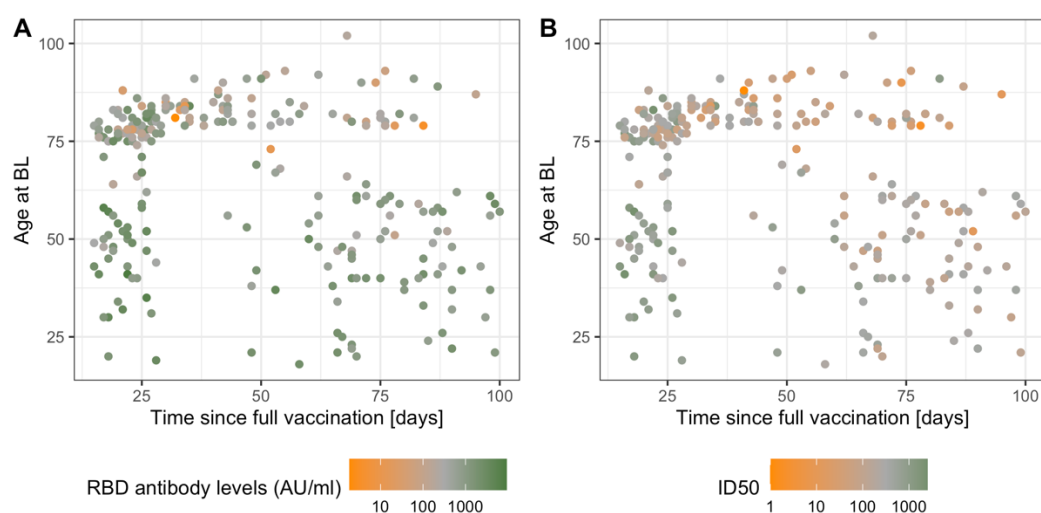

**Supplementary Figure S1:** Scatterplot of the observed time since full vaccination and age of participants in the subset of individuals that were vaccinated twice with the Comirnaty vaccine at least 14 days before blood draw. Panel A shows the measured RBD binding antibody levels of the 272 individuals, panel B the measured ID50 levels of 269 individuals in color.

**Supplemental Figure S2**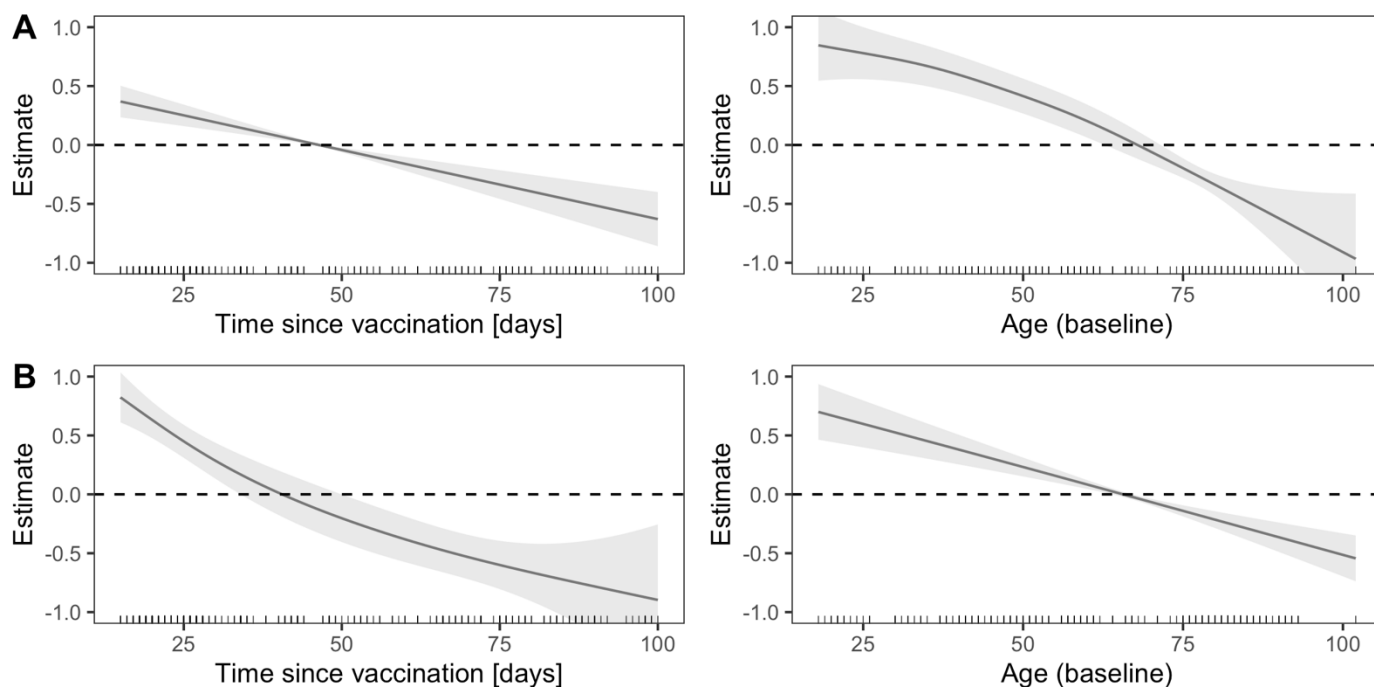

**Supplementary Figure S2:** Estimated non-linear associations of time since vaccination and age at BL with RBD binding antibody levels (Panel A) and neutralizing antibodies (ID 50, Panel B). Shown the estimated non-linear effects and 95%-confidence intervals.

## Supplemental Tables

**Supplemental Table S1. Composition of study population: Infected unvaccinated versus infected and vaccinated individuals tested for Spike-RBD binding antibodies.** (Supplement to Fig. 1A)

| N ab status                               | T3          | T1             |                    |                     |                       |                    |
|-------------------------------------------|-------------|----------------|--------------------|---------------------|-----------------------|--------------------|
| Doses, vaccine                            | 0           | 0              | 1, VX              | 1, COR              | 1, SV                 | 2, COR             |
| N                                         | 164         | 227            | 30                 | 36                  | 4                     | 12                 |
| Sex, female / male                        | 90/74       | 121/106        | 17/13              | 15/21               | 0/4                   | 10/2               |
| AU/ml, median (IQR)                       | 73 (31-303) | 171 (60.8-474) | 14185 (6471-23234) | 42967 (25114-57335) | 114049 (70011-148592) | 15324 (4053-56841) |
| Age in years, median (IQR)                | 46 (28-56)  | 49 (31.5-58)   | 63.5 (46.75-73.5)  | 66.5 (50-68.25)     | 65.5 (48-75,25)       | 56.5 (48-78,5)     |
| Days since last immunization Median (IQR) | n.a.        | n.a.           | 44 (27.75-52.75)   | 23 (17-29.5)        | 26,5 (24-27)          | 54 (24.75-78.75)   |

**Supplemental Table S2. Composition of study population: Infected unvaccinated versus infected and vaccinated individuals tested for neutralization** (Supplement to Fig. 1B)

| N ab status                               | T3           | T1               |                   |                  |                     |                  |
|-------------------------------------------|--------------|------------------|-------------------|------------------|---------------------|------------------|
| Doses, vaccine                            | 0            | 0                | 1, VX             | 1, COR           | 1, SV               | 2, COR           |
| N                                         | 164          | 226              | 28                | 36               | 4                   | 12               |
| Sex, female / male                        | 90/74        | 120/106          | 15/13             | 15/21            | 0/4                 | 10/2             |
| ID50, median (IQR)                        | 140 (63-313) | 72 (34-146)      | 1013 (639-1898)   | 2558 (1377-3001) | 3001 (2971,75-3001) | 1591 (343-2712)  |
| Age in years, median (IQR)                | 46 (28-56)   | 49 (31.25-57.75) | 63.5 (48.25-74.5) | 66.5 (50-68.25)  | 65.5 (48-75,25)     | 56.5 (48-78,5)   |
| Days since last immunization Median (IQR) | n.a.         | n.a.             | 45 (29.25-53)     | 23 (17-29.5)     | 26,5 (24-27)        | 54 (24.75-78.75) |

**Supplemental Table S3. Composition of study population: non-infected individuals immunized with different vaccines, tested for Spike-RBD binding antibodies** (Supplement to Fig. 2A)

| Doses   | 1 immunization |     |    | 2 immunizations |    |
|---------|----------------|-----|----|-----------------|----|
| Vaccine | VX             | COR | SV | COR             | SV |
| N=      | 321            | 287 | 23 | 271             | 15 |

|                                           |               |                 |                |                |                  |
|-------------------------------------------|---------------|-----------------|----------------|----------------|------------------|
| Sex, female / male                        | 179/142       | 135/152         | 12/11          | 163/108        | 10/5             |
| AU/ml, median (IQR)                       | 20 (4.9-53.5) | 20.4 (4.4-71.1) | 152 (36.3-251) | 713 (262-1524) | 2416 (1433-5067) |
| Age in years, median (IQR)                | 57 (45-71)    | 68 (57-71)      | 56 (48-68,5)   | 76 (50-81)     | 76 (55.5-83)     |
| Days since last immunization Median (IQR) | 34 (25-48)    | 21 (18-25)      | 22 (19.5-26)   | 38 (23.5-69.5) | 48 (25-70.5)     |

**Supplemental Table S4. Composition of study population: non-infected individuals immunized with different vaccines, tested for neutralizing antibodies** (Supplement to Fig. 2B)

| Doses                                     | 1 immunization  |                  |                 | 2 immunizations |                |
|-------------------------------------------|-----------------|------------------|-----------------|-----------------|----------------|
| Vaccine                                   | VX              | COR              | SV              | COR             | SV             |
| N=                                        | 319             | 285              | 23              | 268             | 15             |
| Sex, female / male                        | 178/141         | 133/152          | 12/11           | 160/108         | 10/5           |
| ID50, median (IQR)                        | 25.3 (4.3-55.8) | 30.3 (14.1-81.8) | 74.9 (23.2-288) | 253 (103-463)   | 554 (188-1016) |
| Age in years, median (IQR)                | 57 (45-70.5)    | 68 (57-71)       | 56 (48-68,5)    | 76 (50-81)      | 76 (55.5-83)   |
| Days since last immunization Median (IQR) | 34 (25-48)      | 21 (18-25)       | 22 (19.5-26)    | 39 (23-70)      | 48 (25-70.5)   |

**Supplemental Table S5. P-values of pairwise comparisons with two-sided Fisher's exact test** (Supplement for Fig. 5).

|           | 0, T1 | 1, VX, T0          | 1, SV, T0          | 2, SV, T0         | 1,COR, T0         | 2,COR, T0          | 1,COR, T1          | 2,COR, T1         | 1, VX, T1          |
|-----------|-------|--------------------|--------------------|-------------------|-------------------|--------------------|--------------------|-------------------|--------------------|
| 0, T3     | 0.087 | <10 <sup>-10</sup> | 0.001              | 0.021             | 0.014             | 0.154              | <10 <sup>-14</sup> | <10 <sup>-4</sup> | <10 <sup>-9</sup>  |
| 0, T1     |       | <10 <sup>-6</sup>  | <10 <sup>-4</sup>  | 0.001             | 0.465             | <10 <sup>-3</sup>  | <10 <sup>-18</sup> | <10 <sup>-5</sup> | <10 <sup>-12</sup> |
| 1, VX, T0 |       |                    | <10 <sup>-10</sup> | <10 <sup>-6</sup> | <10 <sup>-5</sup> | <10 <sup>-19</sup> | <10 <sup>-31</sup> | <10 <sup>-9</sup> | <10 <sup>-23</sup> |
| 1, SV, T0 |       |                    |                    | 1                 | <10 <sup>-5</sup> | 0.008              | <10 <sup>-3</sup>  | 0.216             | 0.031              |
| 2, SV, T0 |       |                    |                    |                   | <10 <sup>-3</sup> | 0.057              | 0.001              | 0.182             | 0.032              |
| 1,COR, T0 |       |                    |                    |                   |                   | <10 <sup>-5</sup>  | <10 <sup>-20</sup> | <10 <sup>-5</sup> | <10 <sup>-14</sup> |
| 2,COR, T0 |       |                    |                    |                   |                   |                    | <10 <sup>-12</sup> | <10 <sup>-3</sup> | <10 <sup>-7</sup>  |
| 1,COR, T1 |       |                    |                    |                   |                   |                    |                    | 0.250             | 0.203              |
| 2,COR, T1 |       |                    |                    |                   |                   |                    |                    |                   | 1                  |

T1, T3, VX, SV, COR as in Figure legend 5. T0: participants seronegative for N antibodies at all study time points.

**Supplemental Table S6. Composition of study population: IgA Spike-RBD binding antibodies in infected and vaccinated individuals** (Supplement for Fig. 5)

| N ab status                                  | T3               | T1               | N antibody negative |                  |                  |                  |                  |                  | T1               |                   |                  |
|----------------------------------------------|------------------|------------------|---------------------|------------------|------------------|------------------|------------------|------------------|------------------|-------------------|------------------|
| Doses, vaccine                               | 0                | 0                | 1, VX               | 1, SV            | 2, SV            | 1, COR           | 2, COR           | 1, COR           | 2, COR           | 1, VX             | 1, SV            |
| N                                            | 164              | 227              | 323                 | 23               | 15               | 288              | 271              | 36               | 12               | 30                | 4                |
| Sex, female / male                           | 90/74            | 121/106          | 180/143             | 12/11            | 10/5             | 135/153          | 163/108          | 15/21            | 10/2             | 17/13             | 0/4              |
| # IgA [S/Co] >1 /<br># IgA [S/Co] ≤1         | 54/110           | 56/171           | 27/296              | 16/7             | 10/5             | 64/228           | 108/163          | 36/0             | 11/1             | 28/2              | 0/4              |
| IgA [S/Co] median (IQR)                      | 0.60 (0.30-1.54) | 0.57 (0.29-0.98) | 0.25 (0.16-0.42)    | 1.50 (0.82-2.55) | 1.85 (0.81-3.93) | 0.46 (0.24-0.88) | 0.75 (0.42-1.65) | 9.62 (5.61-14.3) | 3.83 (2.13-8.69) | 2.47 (1.85-7.44)  | 12.6 (9.72-14.6) |
| Age in years, median (IQR)                   | 46 (28-56)       | 49 (31.5-58)     | 57 (45-71)          | 56 (48-68,5)     | 76 (55.5-83)     | 68 (57-71)       | 76 (50-81)       | 66.5 (50-68.25)  | 56.5 (48-78,5)   | 63.5 (46.75-73.5) | 65.5 (48-75,25)  |
| Days since last immunization<br>Median (IQR) | n.a.             | n.a.             | 34 (25-48)          | 22 (19.5-26)     | 48 (25-70.5)     | 21 (18-25)       | 38 (23.5-69.5)   | 23 (17-29.5)     | 54 (24.75-78.75) | 44 (27.75-52.75)  | 26,5 (24-27)     |
